# Supplementary material
Source: PubMed Central journal article supplement (PMC5258847)
Supplement: NIHMS835100-supplement-Supp_info.pdf [file NIHMS835100-supplement-Supp_info.pdf]

SUPPORTING INFORMATION

**Table S1.** IDP dataset.

| IDP                            | $N$ | $R_h^a$ | $Q^b$ | $f_{PPIL\text{chain}}^c$ | sequence                                                                                                                                                                                                                                                                             |
|--------------------------------|-----|---------|-------|--------------------------|--------------------------------------------------------------------------------------------------------------------------------------------------------------------------------------------------------------------------------------------------------------------------------------|
| p53(1-93) WT                   | 93  | 32.3    | 15    | 0.489                    | MEEPQSDPSVEPPLSQETFSDLWKLLENVLSPLPSQAMDDL<br>MLSPDDIEQWFTEDPGPDEAPRMPEAAPVAPAPAAPTPAAPA<br>PAPSWPL                                                                                                                                                                                   |
| p53(1-93) ALA <sup>-</sup>     | 93  | 30.4    | 15    | 0.458                    | MEEPQSDPSVEPPLSQETFSDLWKLLENVLSPLPSQGMDDL<br>MLSPDDIEQWFTEDPGPDEGPRMPEGPPVGPGGPTGGPG<br>PGPSWPL                                                                                                                                                                                      |
| p53(1-93) PRO <sup>-</sup>     | 93  | 27.5    | 15    | 0.283                    | MEEGQSDGSVEGGLSQETFSDLWKLLENVLSGLGSQAMDD<br>LMLSGDDIEQWFTEDGGGDEAGRMGEAAGGVAGAGAAGTG<br>AAGAGAGSWGL                                                                                                                                                                                  |
| p53(1-93) ALA PRO <sup>-</sup> | 93  | 27.4    | 15    | 0.252                    | MEEGQSDGSVEGGLSQETFSDLWKLLENVLSGLGSQGMDD<br>LMLSGDDIEQWFTEDGGGDEGGRMGEAGGGVGGGGGGTG<br>GGGGGGGSWGL                                                                                                                                                                                   |
| p53 TAD                        | 73  | 23.8    | 14    | 0.450                    | MEEPQSDPSVEPPLSQETFSDLWKLLENVLSPLPSQAMDDL<br>MLSPDDIEQWFTEDPGPDEAPRMPEAAPRV                                                                                                                                                                                                          |
| Vmw65                          | 89  | 28      | 19    | 0.328                    | GSAGHTRRLSTAPPTDVS LGDELHLDGEDVAMAHADALDDFD<br>LDMLGDGDSPPGPFPHDSAPYGALDMADFEFEQMFTDALGI<br>DEYGG                                                                                                                                                                                    |
| Hdm2-ABD                       | 97  | 31.7    | 29    | 0.335                    | ERSSSESTGTSPNPDLDAGVSEHSGDWLDQDSVSDQFSVEFEV<br>ESLDSSEYSLSEEGQELSDDEDDEVYQVTVYQAGESDTSFEED<br>PEISLADYWK                                                                                                                                                                             |
| prothymosin- $\alpha$          | 110 | 33.6    | 43    | 0.363                    | MSDAAVDTSSSEITTKDLKEKKEVVEEAENGRDAPANGNANEE<br>NGEQEADNEVDEEEEGGEEEEEEEEEGDGEEDGDEDEEAESA<br>TGKRAAEDDEDDDDVDTKKQKTDEDD                                                                                                                                                              |
| HIF1- $\alpha$ -403            | 202 | 44.3    | 29    | 0.402                    | PAAGDTIISLDFGSNDTETDDQQLLEEVPLYNDVMLPSPNEKLQ<br>NINLAMSPLPTAETPKPLRSSADPALNQEVALKLEPNPESLELSF<br>TMPQIQDQTPSPDGGSTRQSSPEPNSPSEYCFYVSDSMVNEFKL<br>ELVEKLFADTEAKNPFSTQDSDLLEMLAPYIPMDDDFQLRS<br>FDQLSPLESSASPEASAPQSTVTVFQ                                                             |
| Fos-AD                         | 168 | 35      | 16    | 0.378                    | GSHMSVASLDLTLGGLPEVATPESEEAFTLPLNDPEPKPSVEPV<br>KSISSEMELKTEPFDDFLFPASSRPSGSETARSPDMDLSGSFYAA<br>DWEPLHSGSLGMGPMATELEPLCTPVVCTPSCTAYTSSVFVT<br>YPEADSFPSCAAHRKGSSENEPSSDLSLSPILLAL                                                                                                   |
| Mlph(147-240)                  | 97  | 28      | 15    | 0.353                    | RLQGGGGSEPSLEENGNDSEQTDEDGDLDTEARDQPLNSKKK<br>KRLLSFRDVDFEEDSDHLVQPCSQTLGLSSVPESAHSLSQSLSGE<br>PYSEDTTSLP                                                                                                                                                                            |
| tau-K45                        | 198 | 45      | 19    | 0.399                    | MSSPGSPGTPGSRRTPSLPTPPTREPKKVAVVRTPPKSPSSAKS<br>RLQTAPVPMPLKLVKSKIGSTENLKHQPGGGKVQIINKLDDL<br>SNVQSKCGSKDNKHPVGGGSVQIVYKPVDSLKVTSKCGSLGN<br>IHHKPGGGQVEVKSEKLDKDRVQSKIGSLDNITHVPGGGNKK<br>IETHKLTFRENAKAKTDHGAEIVY                                                                   |
| Mlph(147-403)                  | 260 | 49      | 28    | 0.370                    | RLQGGGGSEPSLEENGNDSEQTDEDGDLDTEARDQPLNSKKK<br>KRLLSFRDVDFEEDSDHLVQPCSQTLGLSSVPESAHSLSQSLSGE<br>PYSEDTTSLPEGLEETGARALGCRPSPEVQPCSLPSGEDAHA<br>ELDSPAASCKSAFGTTAMPGTDDVRGKHLPSQYLADVDTSD<br>DSIQGPRAASQHSKRRARTVPETQILELNKRMSAVEHLLVHLE<br>NTVLPPSAQEPTVETHPSADTEETLRRRLEELTSNIGSSSTSE |
| p57-ID                         | 73  | 24      | 6     | 0.364                    | VRTSACRSLFGPVDHEELSRELQARLAELNAEDQNRWDYDFQ<br>QDMPLRGPRLQWTEVDSVPAFYRETQV                                                                                                                                                                                                            |
| PDE- $\gamma$                  | 87  | 24.8    | 4     | 0.412                    | MNLEPPKAEIRSATRVMGPPVTPRKPPKFKQRQTRQFKSKPP<br>KKGVQGFDDIPGMEGLGTDITVICPWEAFNHLELHELAYQYII                                                                                                                                                                                            |
| LJIDP1                         | 94  | 24.52   | 4     | 0.356                    | MARSFTNIK AISALVAEEFSNLSARRGYAATAQSAGRVGASMS<br>GKMGSTKSGEKAAAREKVSWVPDPVTGYKPENIKEIDVAE<br>LRS AVLKGN                                                                                                                                                                               |
| cad136                         | 136 | 28.1    | 9     | 0.403                    | RLEQYTS AVVGNKAAKPAKPAASDLVPAEGVRNIKSMWEKG<br>NVFSSPGGTGTPNKETAGLKVGVSSRINELTKTPEGNKSPAP<br>KPSDLRPGDVSGKRNLWEKQSVEKPAASSSKVTATGKKSETN<br>GLRQFEKEP                                                                                                                                  |
| $\alpha$ -synuclein            | 140 | 28.2    | 9     | 0.374                    | MDVFMKGLSKAKEGVVAAAETKQGVVAAAGKTKEGVLYV<br>GSKTKEGVVHGVATVAEKTKEQVTNVGGAVVTGVTAVAQKT<br>VEGAGSIAAATGFVKKDKLQKNEEGAPQEGILEDMPVDPDNE<br>AYEMPSEEGYQDYEP                                                                                                                                |

|                     |     |       |    |       |                                                                                                                                                                                                                                 |
|---------------------|-----|-------|----|-------|---------------------------------------------------------------------------------------------------------------------------------------------------------------------------------------------------------------------------------|
| CFTR-R-region       | 189 | 32    | 5  | 0.364 | GAMESAERRNSILTETLHRFSLEGDAPVSWTETKKQSFKQTGE<br>FGEKRRKNSILNPINSIRKFSIVQKTPLQMNGIEEDSDEPLERRLSL<br>VPDSEQGEAILPRISVISTGPTLQARRRQSVLNLMTHSVNOQQN<br>IHRKTTASTRKVSLAPQANLTELDIYSRRLSQETGLEISEEINEE<br>DLKECLFDDME                  |
| SNAP25              | 206 | 39.7  | 14 | 0.351 | MAEDADMRNELEEMQRRADQLADESLESTRRMLQLVEESKD<br>AGIRTLVMLDEQGEQLERIEEGMDQINKDMKEAEKNLTDLGK<br>FCGLCVCPCNKLKSSDAYKKA WGNNQDGVVASQPARVVDER<br>EQMAISGGFIRRVNTDARENEMDENLEQVSGIIGNLRHMALDM<br>GNEIDTQNRQIDRIMEKADSNKTRIDEANQRATKMLGSG |
| ShB-C               | 146 | 32.9  | 4  | 0.376 | MTLGQHMKKSSLESSESSDMMDLDDGVESTPGLTETHPGRSAV<br>APFLGAQQQQQP VASSLSMSIDKQLQHPLQQLTQTQLYQQQ<br>QQQQQQQNGFKQQQQTQQQLQQQSHTINASAAAATSGS<br>GSSGLTMRHNNALAVSIETDV                                                                    |
| HIF1- $\alpha$ -530 | 170 | 38.3  | 10 | 0.390 | NEFKLELVEKLF AEDTEAKNPFSTQD TDL DLEMLAPYIPMDDD<br>FQLRSFDQLSPLESSASPESAPQSTVTVFQQTQIQEPTANATT<br>TTATTDELKTVTKDRMEDIKILIASPSPTHIHKETTSA TSSPYRD<br>TQSR TASP NRAGKGVIEQTEKSHRSPNVLSVALSOR                                       |
| securin             | 202 | 39.7  | 1  | 0.413 | MATLIYVDKENGEPGTRVVAKDGLKLGSGSPKALDGRSQVST<br>PRFGKTFDAPPALPKATRKALGTVNRATEKSVKTKGPKLQKQP<br>SFSAKKMTEKTVKAKSSVPASDDAYPEIEKFFPFNPLDFESFDL<br>PEEHQIAHLPLSGVPLMILDEERELEKLFQLGPPSPVKMPSPW<br>ESNLLQSPSSILSTLDVELPPVCCDIDI        |
| Abeta(1-40)         | 40  | 14.36 | 3  | 0.308 | DAEFRHDSGYEVHHQKLVFFAEDVGSNKGAIIGLMVGGVV                                                                                                                                                                                        |
| sml1                | 104 | 23.4  | 5  | 0.363 | MQNSQDYFYAQNRCQQQAPSTLRTVTMAEFRRVPLPPMAEV<br>PMLSTQNSMGSSASASASLEMWEKDLEERLNSIDHDMNNNK<br>FGSGELKSMFNQGKVEEMDF                                                                                                                  |
| PGR                 | 135 | 37.7  | 7  | 0.535 | AEPGKPAEPGKPAEPGKPAEPGTPAEPGKPAEPGTPAEPGKPAE<br>PGKPAEPGKPAEPGKPAEPGTPAEPGTPAEPGKPAEPGTPAEPG<br>KPAEPGTPAEPGKPAESGKPVPEGTPAQSGAPEQPNRSMHSTD<br>NKNQ                                                                             |

<sup>a</sup> from literature reports<sup>21-39</sup> with the exception of the WT, PRO<sup>-</sup>, ALA<sup>-</sup>PRO<sup>-</sup> variants of p53(1-93), Hdm2-ADB, prothymosin- $\alpha$ , and PGR which were measured in the current study; in Å

<sup>b</sup> net charge estimated from sequence as the absolute value for the number of ASP and GLU residues minus the number of LYS and ARG residue

<sup>c</sup> calculated from sequence using  $PP_{II}$  propensities determined experimentally for each amino acid type<sup>79</sup>

**Table S2.**  $R_h$  from simulated ensembles and sequence properties of IDP fragments.

| IDP                   | 25 residue fragment                 | $R_h$ <sup>a</sup> | $f_{PP_{II},chain}$ <sup>b</sup> | $ncd$ <sup>c</sup> | $f_{PP_{II},chain}$ <sup>d</sup> | $ncd$ <sup>e</sup> |
|-----------------------|-------------------------------------|--------------------|----------------------------------|--------------------|----------------------------------|--------------------|
| p53(1-93)             | N-term: MEEPQSDPSVEPPLSQETFSDLWKL   | 12.04              | 0.443                            | 1.00               | 0.489                            | 1.555              |
|                       | C-term: AAPPVAPAPAAPTPAAPAPAPSWPL   | 11.56              | 0.606                            | 0.00               |                                  |                    |
|                       | Center: LPSQAMDDLMLSPDDIEQWFTEDPG   | 11.83              | 0.398                            | 1.40               |                                  |                    |
| p53(1-93) PRO         | N-term: MEEGQSDGSVEGGLSQETFSDLWKL   | 11.01              | 0.304                            | 1.00               | 0.283                            | 1.555              |
|                       | C-term: AAGGVAGAGAAGTGAAGAGAGSWGL   | 10.50              | 0.258                            | 0.00               |                                  |                    |
|                       | Center: LGSQAMDDLMLSGDDIEQWFTEDGG   | 10.73              | 0.294                            | 1.40               |                                  |                    |
| p53(1-93) ALA-PRO     | N-term: MEEGQSDGSVEGGLSQETFSDLWKL   | 11.01              | 0.304                            | 1.00               | 0.252                            | 1.555              |
|                       | C-term: GGGGVGGGGGGTGGGGGGGWSGL     | 9.89               | 0.162                            | 0.00               |                                  |                    |
|                       | Center: LGSQMDDLMLSGDDIEQWFTEDGG    | 11.21              | 0.284                            | 1.40               |                                  |                    |
| PGR                   | N-term: AEPGKPAEPGKPAEPGKPAEPGTPA   | 11.19              | 0.562                            | 0.20               | 0.535                            | 0.602              |
|                       | C-term: PGTPAQSGAPEQPNRSMHSTDKNQ    | 11.36              | 0.439                            | 0.00               |                                  |                    |
|                       | Center: EPGKPAEPGTPAEPGTPAEPGKPAE   | 11.11              | 0.554                            | 0.60               |                                  |                    |
| Hdm2-ABD              | N-term: ERSSESSESTGTPSNPDL DAGVSEHS | 11.55              | 0.341                            | 0.80               | 0.335                            | 2.945              |
|                       | C-term: VYQAGESDTSFEEDPEISLADYWK    | 11.55              | 0.353                            | 1.40               |                                  |                    |
|                       | Center: QFSVEFEVESLDS EYSLSEEGQEL   | 11.70              | 0.321                            | 1.80               |                                  |                    |
| prothymosin- $\alpha$ | N-term: MSDAAVDTSEITTKDLKEKKEVVE    | 11.79              | 0.376                            | 0.60               | 0.363                            | 4.100              |
|                       | C-term: TGKRAAEDDEDDVDTKKQKTEDDD    | 11.46              | 0.373                            | 1.40               |                                  |                    |
|                       | Center: NGEQEADNEVDEEEEGGEEEEEEEE   | 11.46              | 0.365                            | 3.40               |                                  |                    |
| ShB-C                 | N-term: MTLGQHMKKSSLSESSDMMDLDDG    | 11.51              | 0.306                            | 0.60               | 0.376                            | 0.331              |
|                       | C-term: TSGSGSSGLTMRHNNALAVSIETDV   | 11.36              | 0.286                            | 0.20               |                                  |                    |
|                       | Center: MSIDKQLQHPLQQLTQTQLYQQQQQ   | 12.10              | 0.429                            | 0.00               |                                  |                    |
| securin               | N-term: MATLIYVDKENGEPGTRVVAKDGLK   | 11.84              | 0.368                            | 0.00               | 0.413                            | 0.070              |
|                       | C-term: LLQSPSSILSTLDVELPPVCCDIDI   | 11.71              | 0.391                            | 0.80               |                                  |                    |
|                       | Center: AKKMTEKTVKAKSSVPASDDAYPEI   | 11.63              | 0.434                            | 0.20               |                                  |                    |
| Fos-AD                | N-term: GSHMSVASLDLTGGLPEVATPESEE   | 11.47              | 0.351                            | 1.00               | 0.378                            | 1.234              |
|                       | C-term: AAHRKGSSENEPSSDSLSPDLLAL    | 11.04              | 0.343                            | 0.00               |                                  |                    |
|                       | Center: TARSVPDMDLSGSFYAADWEPLHSG   | 11.80              | 0.338                            | 0.60               |                                  |                    |
| HIF1- $\alpha$ -530   | N-term: NEFKLELVEKLF AEDTEAKNPFSTQ  | 11.16              | 0.376                            | 0.60               | 0.390                            | 0.767              |
|                       | C-term: KGVIEQTEKSHPRSPNVLVLSQR     | 11.79              | 0.403                            | 0.40               |                                  |                    |
|                       | Center: FQQTQIQEPTANATTTTATTDELKT   | 11.28              | 0.395                            | 0.40               |                                  |                    |
| tau-K45               | N-term: MSSPGSPGTPGSRSRTPSLPTPTR    | 11.80              | 0.474                            | 0.60               | 0.399                            | 1.350              |
|                       | C-term: KIETHKLTFRENAKAKTDHGAEIVY   | 11.99              | 0.355                            | 0.20               |                                  |                    |
|                       | Center: LSNVQSKCGSKDNIKHVPGGGSVQI   | 11.60              | 0.348                            | 0.40               |                                  |                    |

<sup>a</sup> calculated from simulated ensemble generated for fragment sequence; in Å

<sup>b</sup> calculated from fragment sequence using  $PP_{II}$  propensities determined experimentally for each amino acid type<sup>79</sup>

<sup>c</sup> net charge density ( $ncd$ ) calculated for the fragment using equation 1

<sup>d</sup> calculated for parent sequence using  $PP_{II}$  propensities determined experimentally for each amino acid type<sup>79</sup>

<sup>e</sup> net charge density ( $ncd$ ) calculated for parent sequence using equation 1

**Table S3.** Charge-based properties calculated from sequence for each dataset IDP.

| IDP                                         | $ncd^a$ | $ncpr^b$ | $\kappa^c$ |
|---------------------------------------------|---------|----------|------------|
| p53(1-93) WT                                | 1.555   | 0.161    | 0.202      |
| p53(1-93) ALA <sup>-</sup>                  | 1.555   | 0.161    | 0.202      |
| p53(1-93) PRO <sup>-</sup>                  | 1.555   | 0.161    | 0.202      |
| p53(1-93) ALA <sup>-</sup> PRO <sup>-</sup> | 1.555   | 0.161    | 0.202      |
| p53 TAD                                     | 1.639   | 0.191    | 0.171      |
| Vmw65                                       | 2.014   | 0.213    | 0.203      |
| Hdm2-ABD                                    | 2.945   | 0.299    | 0.209      |
| prothymosin- $\alpha$                       | 4.100   | 0.391    | 0.423      |
| HIF1- $\alpha$ -403                         | 2.040   | 0.144    | 0.171      |
| Fos-AD                                      | 1.234   | 0.095    | 0.211      |
| Mlph(147-240)                               | 1.523   | 0.155    | 0.388      |
| tau-K45                                     | 1.350   | 0.096    | 0.113      |
| Mlph(147-403)                               | 1.736   | 0.108    | 0.317      |
| p57-ID                                      | 0.702   | 0.082    | 0.207      |
| PDE- $\gamma$                               | 0.429   | 0.046    | 0.327      |
| LJIDP1                                      | 0.413   | 0.043    | 0.145      |
| cad136                                      | 0.772   | 0.066    | 0.096      |
| $\alpha$ -synuclein                         | 0.761   | 0.064    | 0.172      |
| CFTR-R-region                               | 0.367   | 0.026    | 0.284      |
| SNAP25                                      | 0.975   | 0.068    | 0.160      |
| ShB-C                                       | 0.331   | 0.027    | 0.320      |
| HIF1- $\alpha$ -530                         | 0.767   | 0.059    | 0.158      |
| securin                                     | 0.070   | 0.005    | 0.203      |
| Abeta(1-40)                                 | 0.474   | 0.075    | 0.211      |
| sml1                                        | 0.490   | 0.048    | 0.143      |
| PGR                                         | 0.602   | 0.052    | 0.058      |

<sup>a</sup> net charge density ( $ncd$ ) calculated using equation 1

<sup>b</sup> net charge per residue ( $ncpr$ ) calculated as the net charge divided by  $N$

<sup>c</sup>  $\kappa$  calculated from sequence<sup>49</sup> using the program localCIDER downloaded from [pappulab.github.io/localCIDER/](http://pappulab.github.io/localCIDER/)

**Table S4.** Sequence properties and amino acid scales with best correlation ( $R^2$ ) to equation 6 error.

| <u><math>R^2</math></u> | <u>scale</u>                                                                             |
|-------------------------|------------------------------------------------------------------------------------------|
| 0.32                    | frequency of $\alpha$ helix in all- $\alpha$ class <sup>104</sup>                        |
| 0.28                    | aperiodic indices for $\alpha$ proteins <sup>105</sup>                                   |
| 0.27                    | $\alpha$ helix indices for $\alpha$ proteins <sup>105</sup>                              |
| 0.23                    | ASN fractional composition                                                               |
| 0.23                    | frequency of occurrence in beta-bends <sup>101</sup>                                     |
| 0.22                    | weights for coil at the window position of -5 <sup>106</sup>                             |
| 0.21                    | normalized frequency of $\alpha$ helix <sup>107</sup>                                    |
| 0.21                    | information measure for loop <sup>108</sup>                                              |
| 0.21                    | normalized frequency of $\alpha$ helix from LG <sup>104</sup>                            |
| 0.21                    | information measure for turn <sup>108</sup>                                              |
| 0.21                    | normalized frequency of $\alpha$ helix <sup>109</sup>                                    |
| 0.21                    | normalized frequency of $\alpha$ helix <sup>110</sup>                                    |
| 0.20                    | normalized frequency of $\alpha$ helix <sup>111</sup>                                    |
| 0.20                    | normalized frequency of $\alpha$ helix, unweighted <sup>112</sup>                        |
| 0.20                    | relative preference at C3, specific locations at ends of $\alpha$ helices <sup>113</sup> |
| 0.20                    | normalized frequency of $\alpha$ helix <sup>99</sup>                                     |
| 0.20                    | information measure for $\alpha$ helix <sup>108</sup>                                    |
| 0.19                    | average probability of a helix <sup>114</sup>                                            |
| 0.19                    | helix-coil equilibrium constant <sup>115</sup>                                           |
| 0.18                    | positional frequency at helix termini N5 <sup>96</sup>                                   |

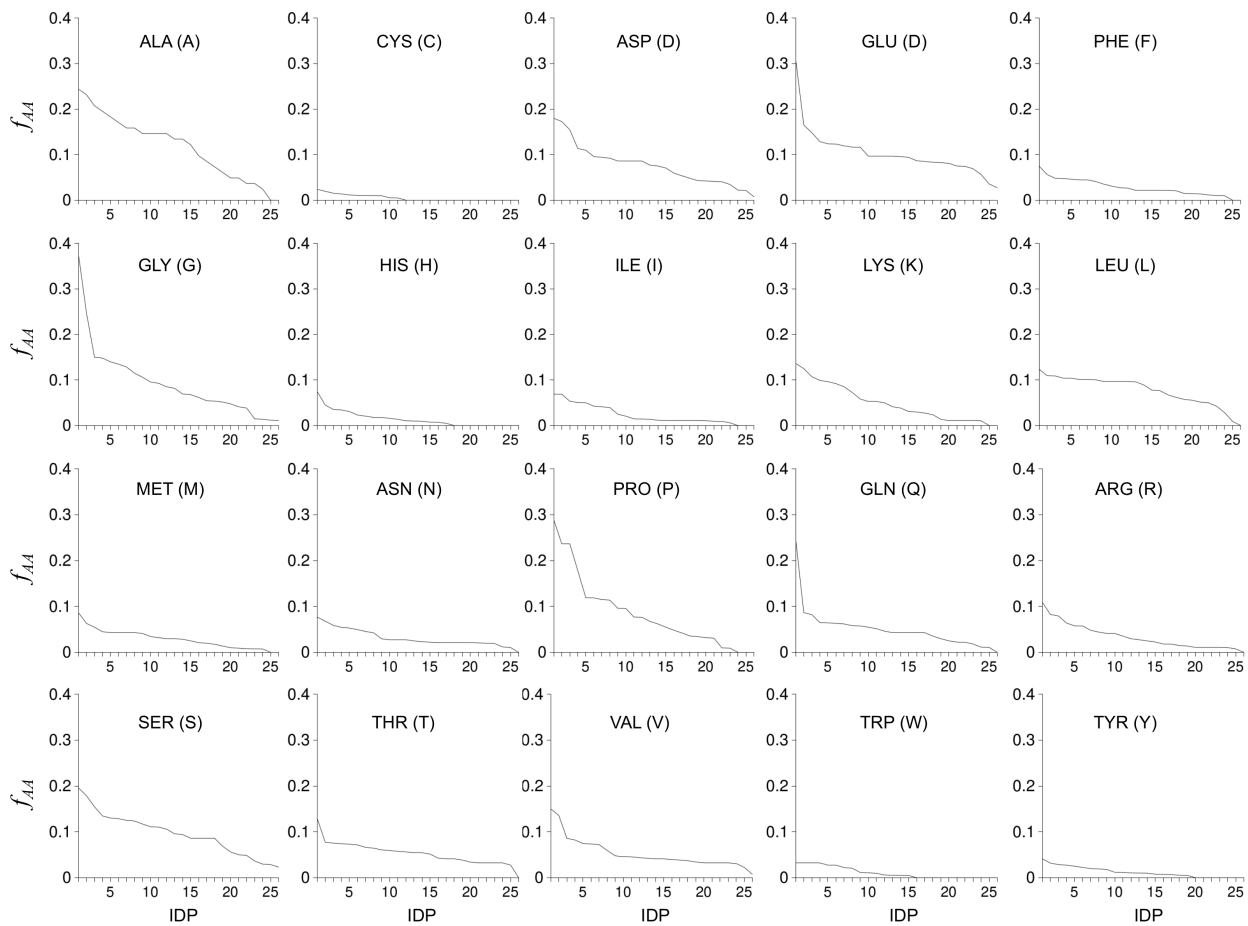

**Figure S1.** Fractional amino acid composition ( $f_{AA}$ ) in the IDP dataset. Fractional composition was determined by summing the number of amino acids of a specific type in a sequence and dividing by  $N$ , shown in rank order from left to right for each of the 26 IDPs. Amino acid type is indicated in the panel figures.

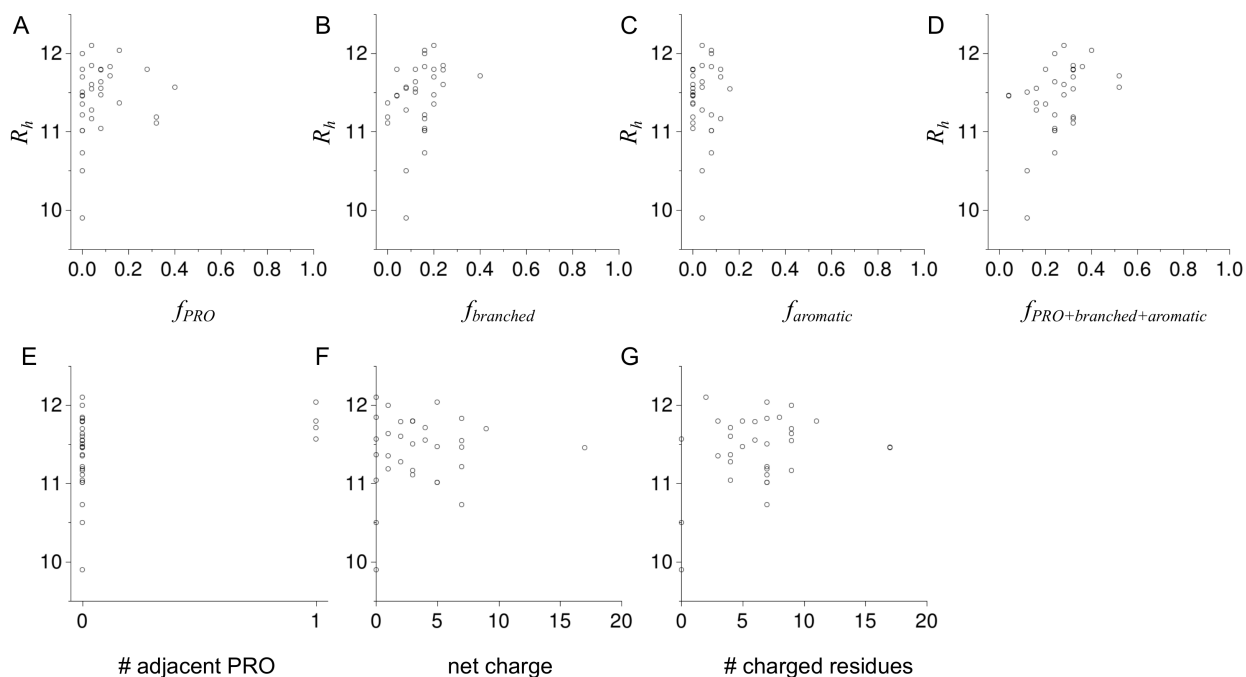

**Figure S2.** Open circles show  $R_h$  calculated from ensembles that were simulated for each 25-residue IDP fragment and the corresponding **A)** fractional PRO composition ( $f_{PRO}$ ), **B)** fractional composition of branched residues ( $f_{branched}$ ), **C)** fractional composition of aromatic residues ( $f_{aromatic}$ ), **D)** fractional composition of PRO + branched + aromatic residues ( $f_{PRO+branched+aromatic}$ ), **E)** number of sequentially adjacent PRO residues, **F)** net charge, and **G)** number of charged residues in the fragment sequence.

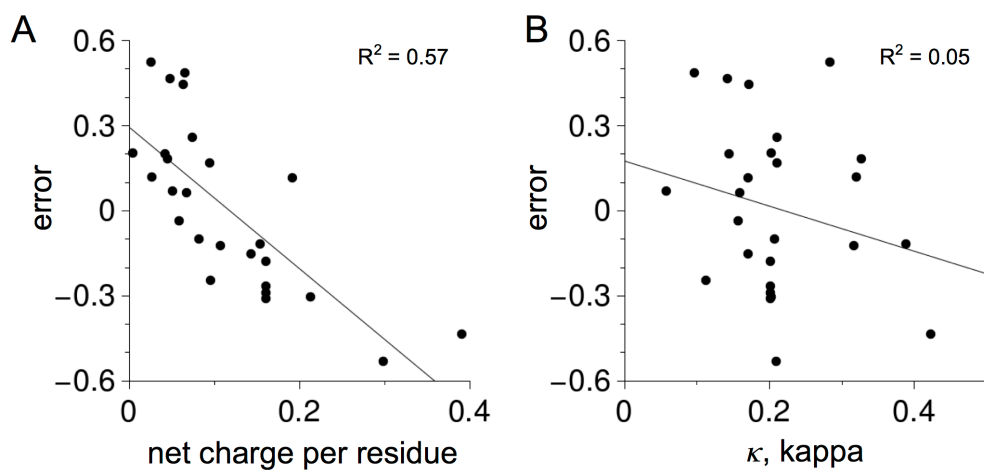

**Figure S3.** Comparison of the error from predicting  $R_h$  from sequence using equation 4, normalized for IDP size (equation 5), to net charge per residue (panel **A**) and  $\kappa$  (panel **B**). Net charge per residue and  $\kappa$  from sequence for each IDP is given in Table S3.



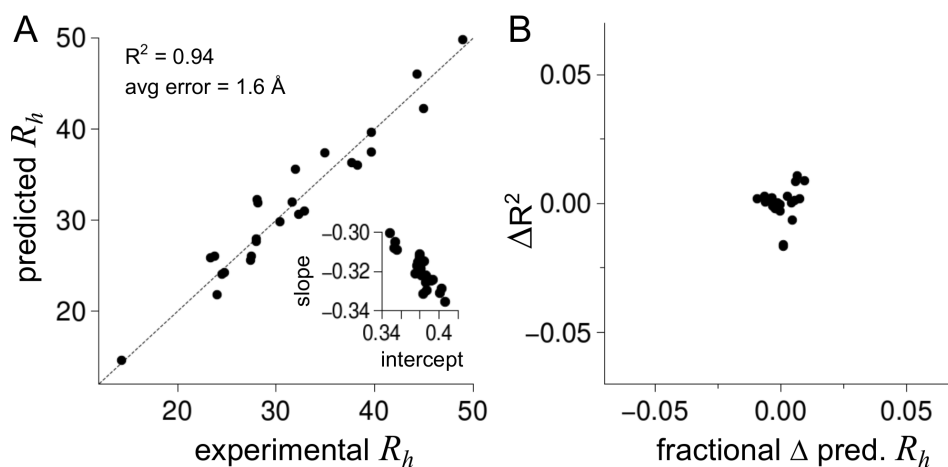

**Figure S4.** The effect of removing prothymosin- $\alpha$  from the IDP dataset on predicting  $R_h$  from intrinsic  $PP_{II}$  propensities and net charge. **A)** Removing prothymosin- $\alpha$  caused the linear trend in Fig. 4C to change from error =  $-0.25 \cdot (\text{net charge density}) + 0.31$ , with  $R^2 = 0.58$ , to error =  $-0.32 \cdot (\text{net charge density}) + 0.38$ , with  $R^2 = 0.61$ . Applying these trend changes to equation 6 yields  $R_h = 2.16 \cdot N^{0.503 - 0.11 \cdot \ln(1 - f_{PPI})} + 0.32 \cdot Q - 0.38 \cdot N^{0.5}$ . Using this new equation to predict  $R_h$  gives the panel A data. The stippled line is the identity line. Inset: slope and intercept variations in the error trend owing to removal of individual IDPs (in addition to prothymosin- $\alpha$ ) from the training set. **B)** Each circle represents the removal of a singular IDP, in addition to prothymosin- $\alpha$ , from the training set. The concomitant change in correlation for predicted and experimental  $R_h$  ( $\Delta R^2$ ) is compared to the fractional change in predicted  $R_h$  for the removed IDP.

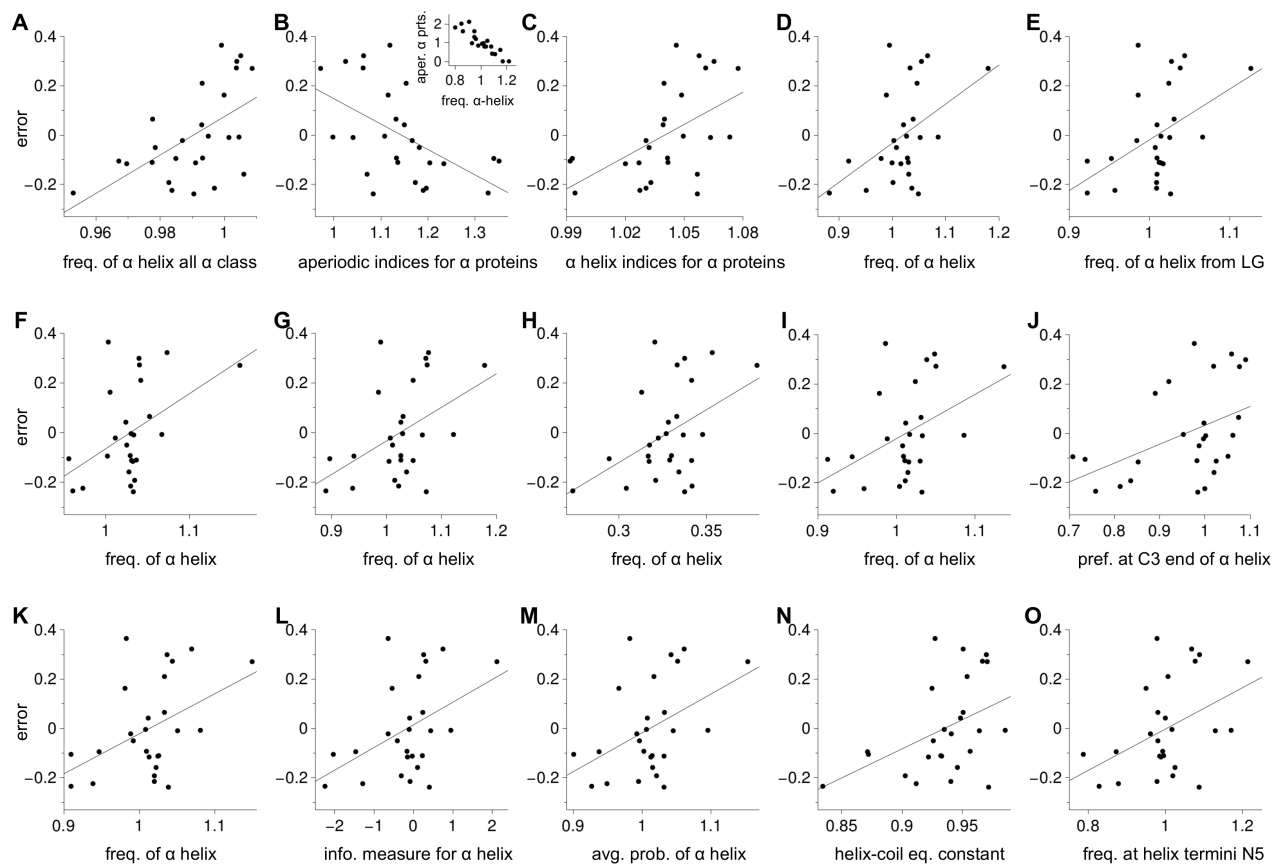

**Figure S5.** Correlation of equation 6 error to each  $\alpha$  helix scale that is listed in Table S4. Panel order from **A** through **O** follows Table S4 order from top to bottom. The aperiodic indices for  $\alpha$  proteins<sup>105</sup> in panel **B** represents the preference for non-regular (i.e., aperiodic) structure in  $\alpha$  proteins and shows a strong anti-correlation to  $\alpha$  helix propensity scales. For example, the inset compares the normalized frequency of  $\alpha$  helix scale<sup>104</sup> (x-axis) from panel **A** to the aperiodic indices for  $\alpha$  proteins scale (y-axis), which correlates by  $R^2 = 0.826$ . Thus, decreases in aperiodic indices represent increases in  $\alpha$  helix propensity. This anti-correlation is why the trend in **B** is opposite to trends in panels **A** and **C** through **O**.
